# Supplementary material for: Exploration of new second-order nonlinear optical materials of the Cs–Hg–Br–I system
Source: Royal Society of Chemistry journal article supplement (doi:10.1039/c3dt53463d), 2014-01-01
Supplement: c3dt53463d1.pdf [file c3dt53463d1.pdf]

Supplementary information for  
**Exploration of new second-order nonlinear optical materials in  
the Cs-Hg-Br-I systems**

*Qi Wu*<sup>a</sup>, *Yin Huang*<sup>a</sup>, *Xianggao Meng*<sup>b</sup>, *Cheng Zhong*<sup>a\*</sup>,  
*Xingguo Chen*<sup>a</sup> and *Jingui Qin*<sup>a\*</sup>

<sup>a</sup>Department of Chemistry, Wuhan University, Wuhan 430072, China

<sup>b</sup>College of Chemistry, Central China Normal University, Wuhan  
430079, China

***Captions of the figures***

**Figure S1.** X-ray diffraction powder patterns for Cs<sub>2</sub>Hg<sub>2</sub>Br<sub>2</sub>I<sub>4</sub>·H<sub>2</sub>O:  
Calculated and experimental

**Figure S2.** X-ray diffraction powder patterns for Cs<sub>2</sub>Hg<sub>3</sub>I<sub>8</sub>·H<sub>2</sub>O:  
Calculated and experimental.

**Figure S3.** Phase-matching curve for Cs<sub>2</sub>Hg<sub>2</sub>Br<sub>2</sub>I<sub>4</sub>·H<sub>2</sub>O.

**Figure S4.** Phase-matching curve for Cs<sub>2</sub>Hg<sub>3</sub>I<sub>8</sub>·H<sub>2</sub>O.

**Figure S5.** ATR-FTIR spectrum for Cs<sub>2</sub>Hg<sub>2</sub>Br<sub>2</sub>I<sub>4</sub>·H<sub>2</sub>O.

**Figure S6.** Raman spectrum for Cs<sub>2</sub>Hg<sub>2</sub>Br<sub>2</sub>I<sub>4</sub>·H<sub>2</sub>O.

**Figure S7.** ATR-FTIR spectrum for Cs<sub>2</sub>Hg<sub>3</sub>I<sub>8</sub>·H<sub>2</sub>O.

**Figure S8.** Raman spectrum for Cs<sub>2</sub>Hg<sub>3</sub>I<sub>8</sub>·H<sub>2</sub>O.

**Figure S9.** UV-Vis absorption spectrum for Cs<sub>2</sub>Hg<sub>2</sub>Br<sub>2</sub>I<sub>4</sub>·H<sub>2</sub>O.

**Figure S10.** UV-Vis absorption spectrum for Cs<sub>2</sub>Hg<sub>3</sub>I<sub>8</sub>·H<sub>2</sub>O.

**Figure S11.** Total and partial density of states for compounds  $\text{Cs}_2\text{Hg}_2\text{Br}_2\text{I}_4 \cdot \text{H}_2\text{O}$  using the rPBE/norm-conserving pseudopotential method.

**Figure S12.** Total and partial density of states for compounds  $\text{Cs}_2\text{Hg}_3\text{I}_8 \cdot \text{H}_2\text{O}$  using the rPBE/norm-conserving pseudopotential method.

**Figure S13.** The band structure of  $\text{Cs}_2\text{Hg}_2\text{Br}_2\text{I}_4 \cdot \text{H}_2\text{O}$ .

**Figure S14.** The band structure of  $\text{Cs}_2\text{Hg}_3\text{I}_8 \cdot \text{H}_2\text{O}$ .

**Figure S15.** Calculated Refractive Indices for  $\text{Cs}_2\text{Hg}_2\text{Br}_2\text{I}_4 \cdot \text{H}_2\text{O}$ .

**Figure S16.** Calculated Refractive Indices for  $\text{Cs}_2\text{Hg}_2\text{Br}_2\text{I}_4 \cdot \text{H}_2\text{O}$ .

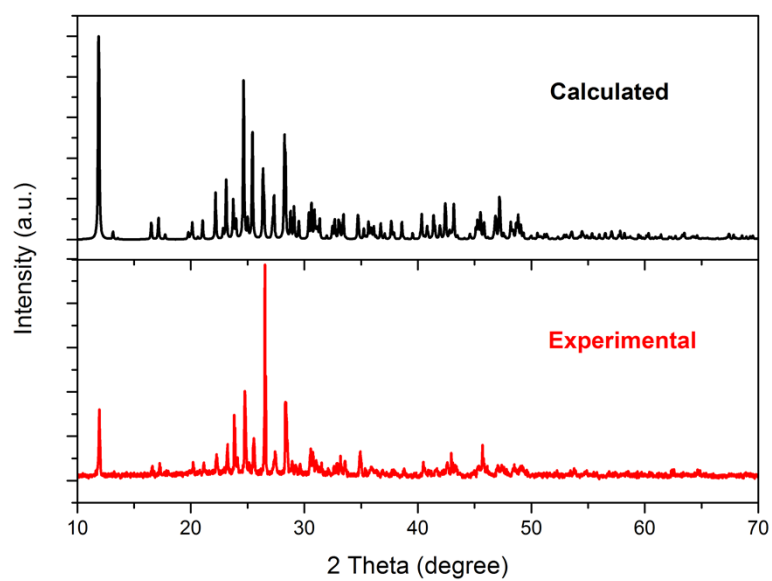

**Figure S1.** X-ray diffraction powder patterns for  $\text{Cs}_2\text{Hg}_2\text{Br}_2\text{I}_4 \cdot \text{H}_2\text{O}$ : Calculated and experimental.

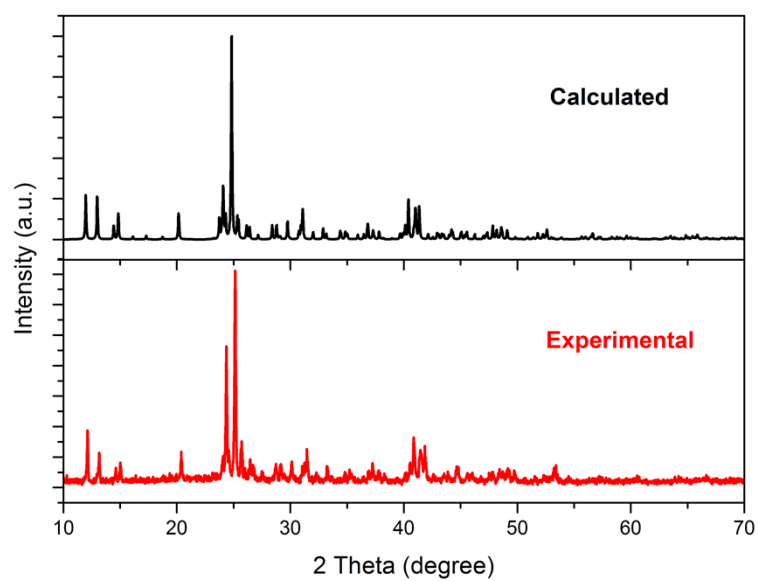

**Figure S2.** X-ray diffraction powder patterns for  $\text{Cs}_2\text{Hg}_3\text{I}_8 \cdot \text{H}_2\text{O}$ : Calculated and experimental

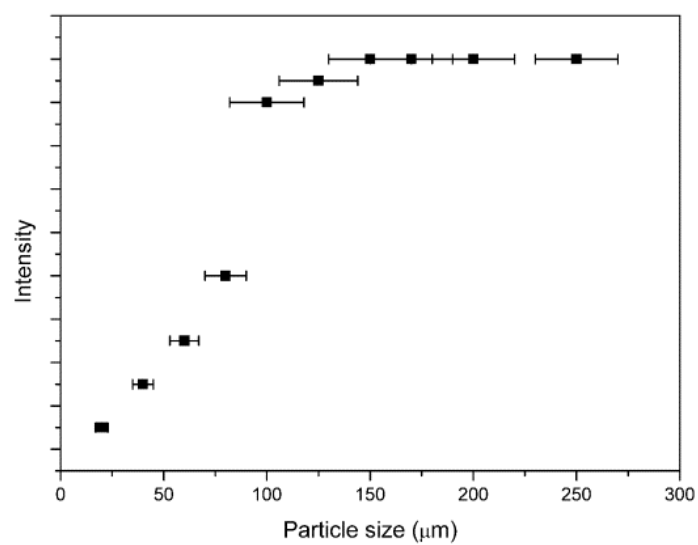

**Figure S3.** Phase-matching curve for  $\text{Cs}_2\text{Hg}_2\text{Br}_2\text{I}_4 \cdot \text{H}_2\text{O}$ .

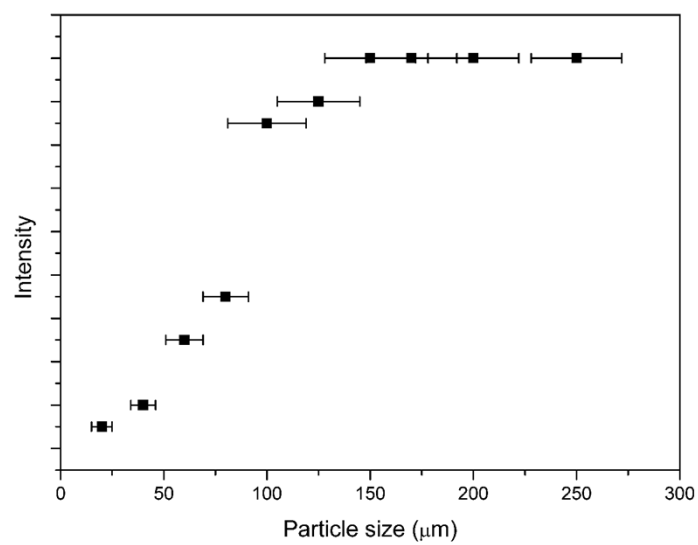

**Figure S4.** Phase-matching curve for  $\text{Cs}_2\text{Hg}_3\text{I}_8 \cdot \text{H}_2\text{O}$ .

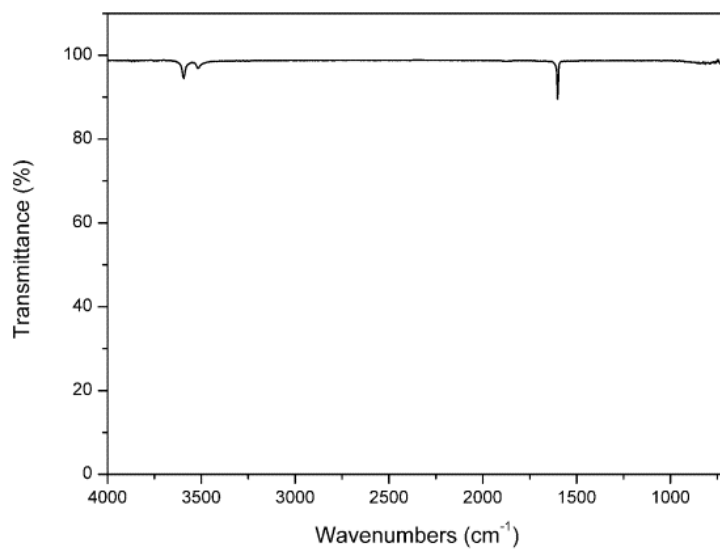

**Figure S5.** ATR-FTIR spectrum for Cs<sub>2</sub>Hg<sub>2</sub>Br<sub>2</sub>I<sub>4</sub>·H<sub>2</sub>O.

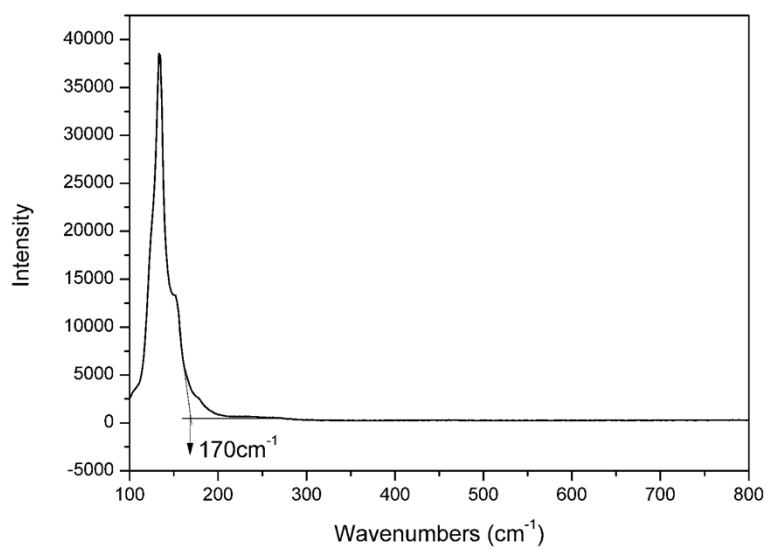

**Figure S6.** Raman spectrum for Cs<sub>2</sub>Hg<sub>2</sub>Br<sub>2</sub>I<sub>4</sub>·H<sub>2</sub>O.

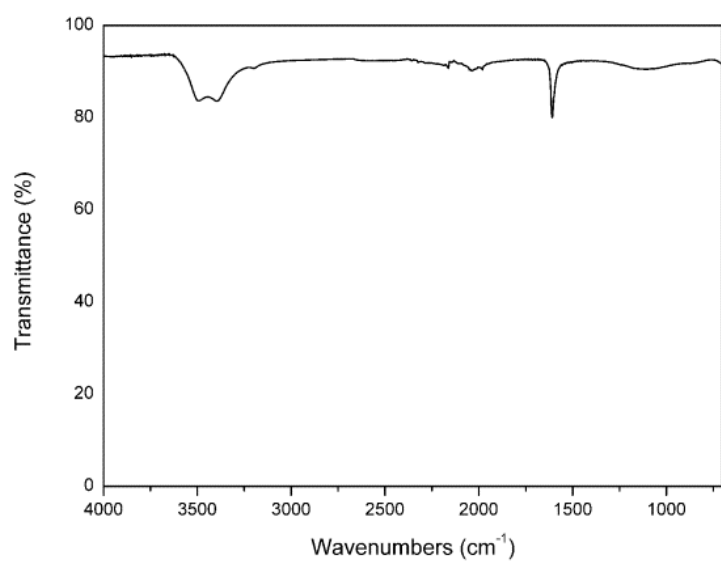

**Figure S7.** ATR-FTIR spectrum for  $\text{Cs}_2\text{Hg}_3\text{I}_8 \cdot \text{H}_2\text{O}$ .

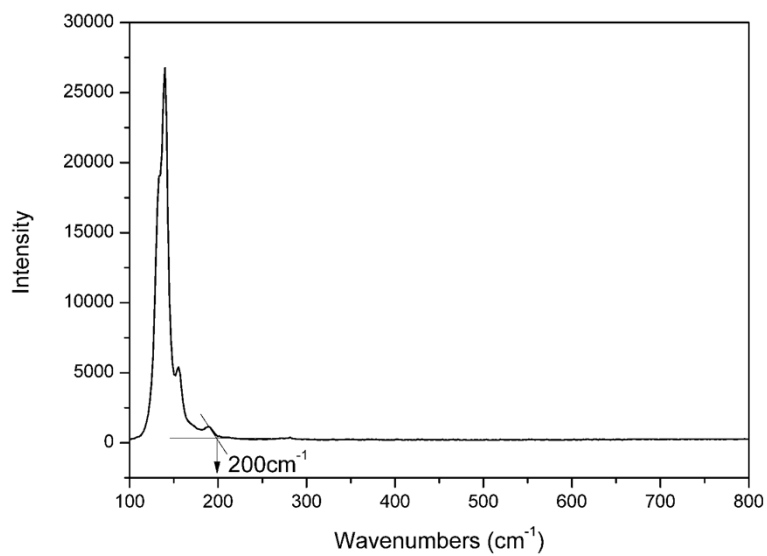

**Figure S8.** Raman spectrum for  $\text{Cs}_2\text{Hg}_3\text{I}_8 \cdot \text{H}_2\text{O}$ .

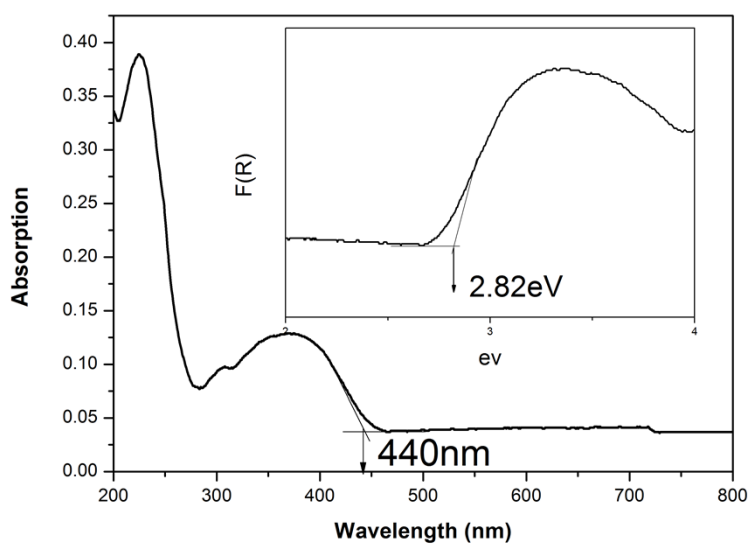

**Figure S9.** UV-Vis absorption spectrum for  $\text{Cs}_2\text{Hg}_2\text{Br}_2\text{I}_4 \cdot \text{H}_2\text{O}$ .

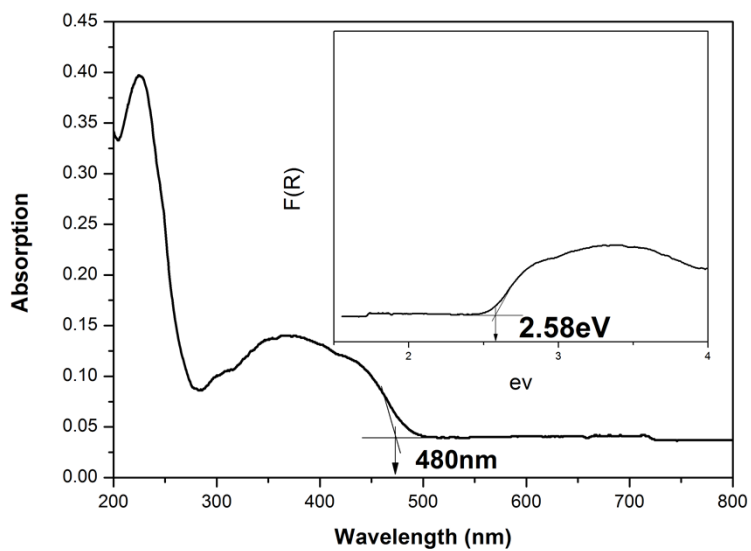

**Figure S10.** UV-Vis absorption spectrum for  $\text{Cs}_2\text{Hg}_3\text{I}_8 \cdot \text{H}_2\text{O}$ .

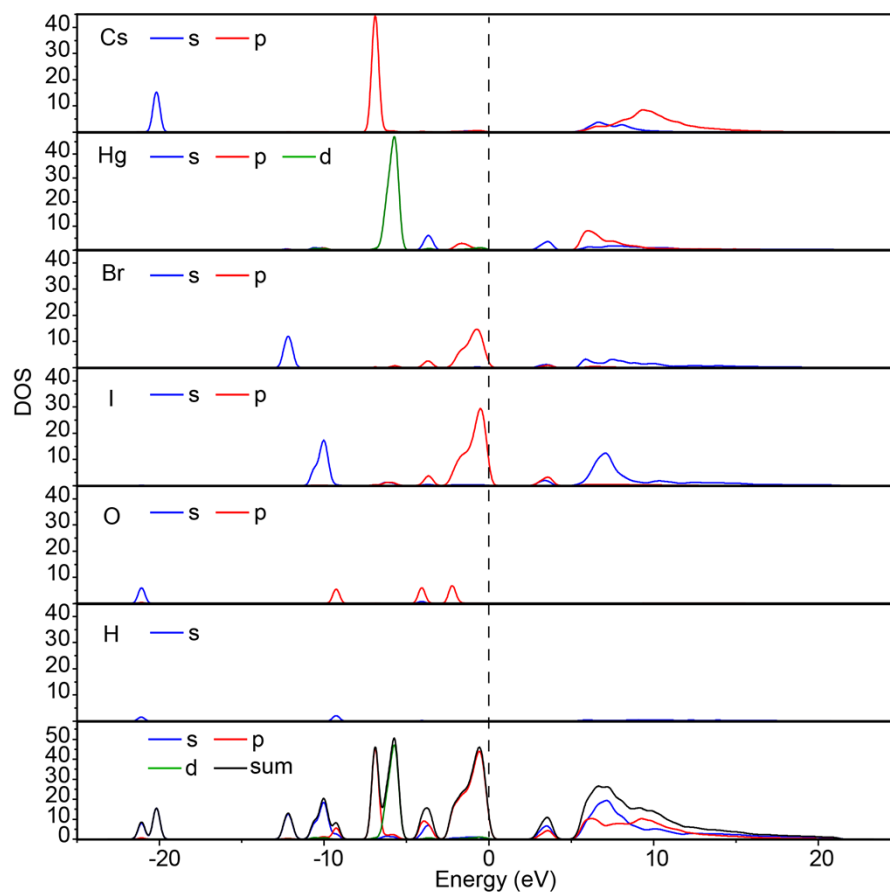

**Figure S11.** Total and partial density of states for compounds  $\text{Cs}_2\text{Hg}_2\text{Br}_2\text{I}_4 \cdot \text{H}_2\text{O}$  using the rPBE/norm-conserving pseudopotential method.



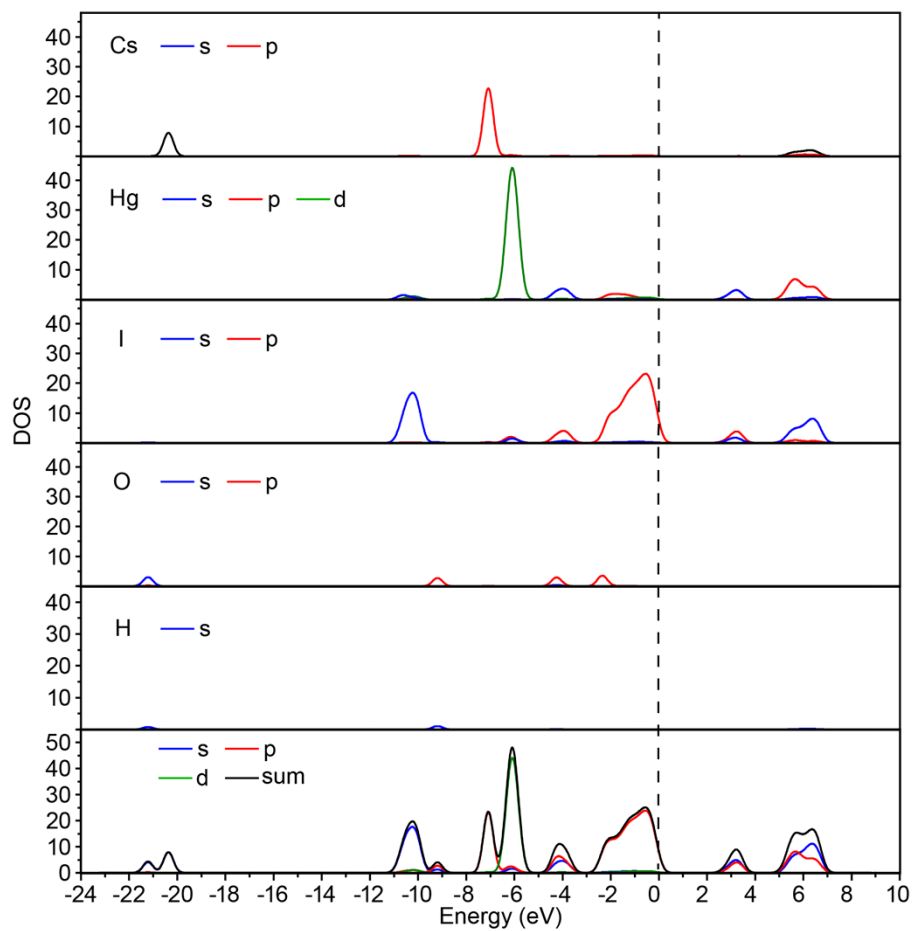

**Figure S12.** Total and partial density of states for compounds  $\text{Cs}_2\text{Hg}_3\text{I}_8 \cdot \text{H}_2\text{O}$  using the rPBE/norm-conserving pseudopotential method.

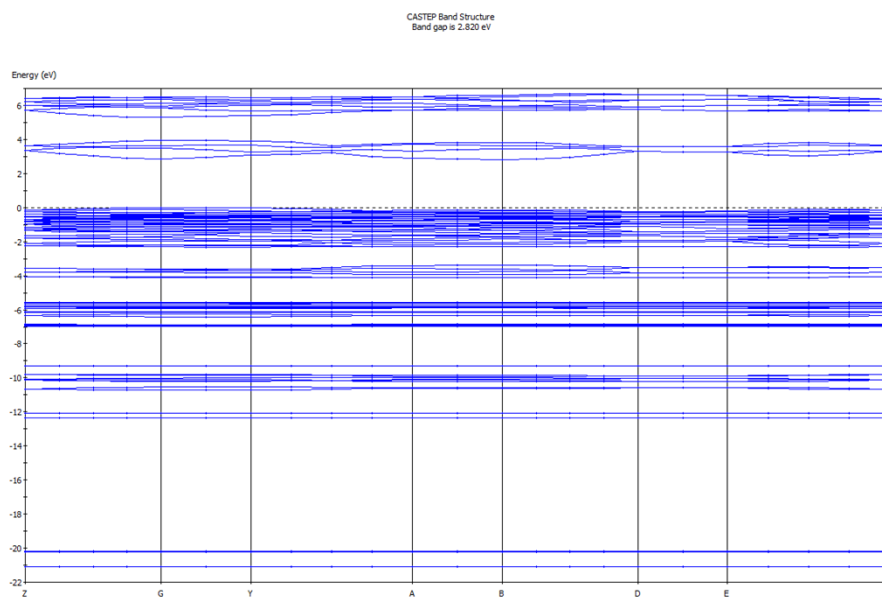

**Figure S13.** The band structures of  $\text{Cs}_2\text{Hg}_2\text{Br}_2\text{I}_4 \cdot \text{H}_2\text{O}$ .

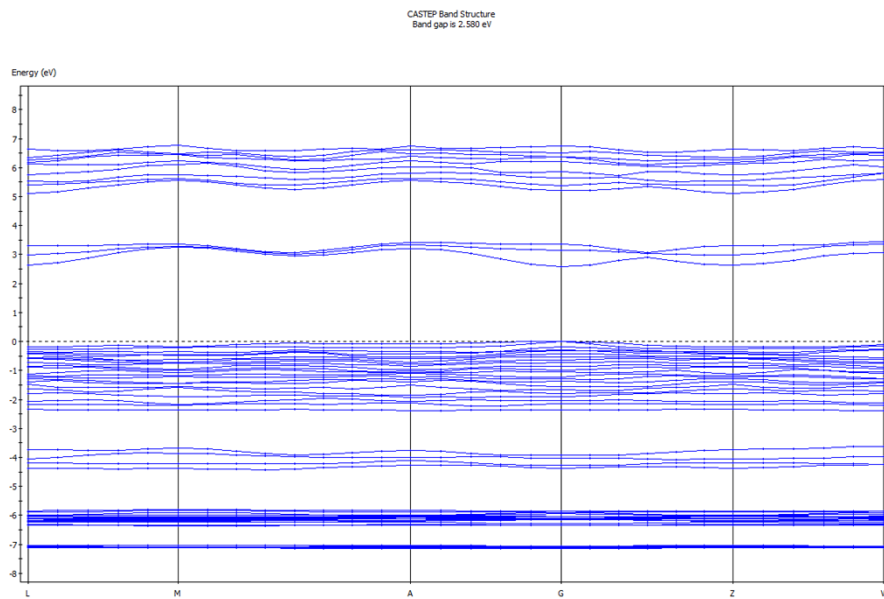

**Figure S14.** The band structures of  $\text{Cs}_2\text{Hg}_3\text{I}_8 \cdot \text{H}_2\text{O}$ .

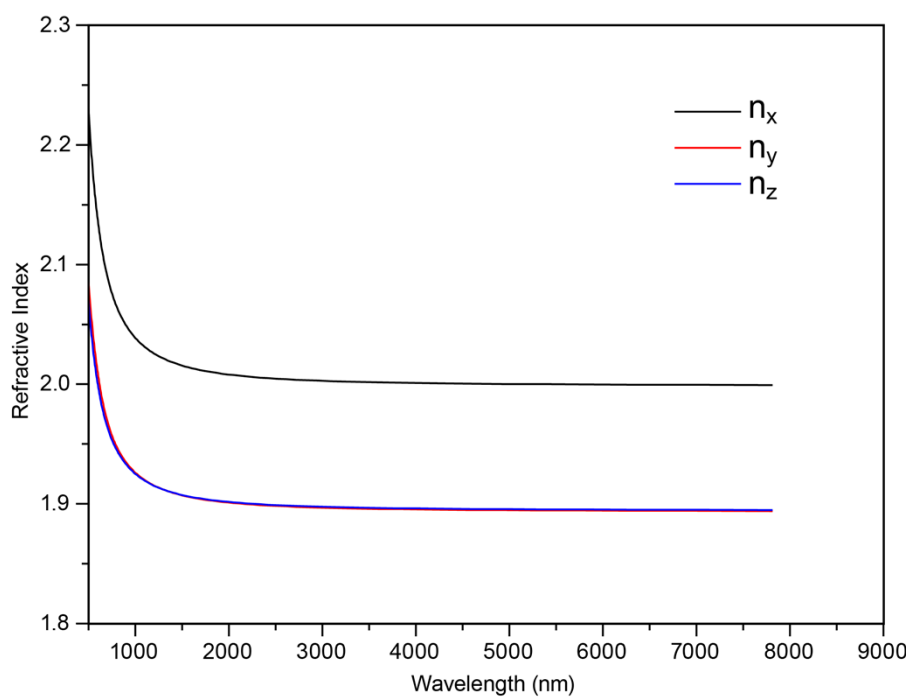

**Figure S15.** Calculated Refractive Indices for  $\text{Cs}_2\text{Hg}_2\text{Br}_2\text{I}_4 \cdot \text{H}_2\text{O}$ .

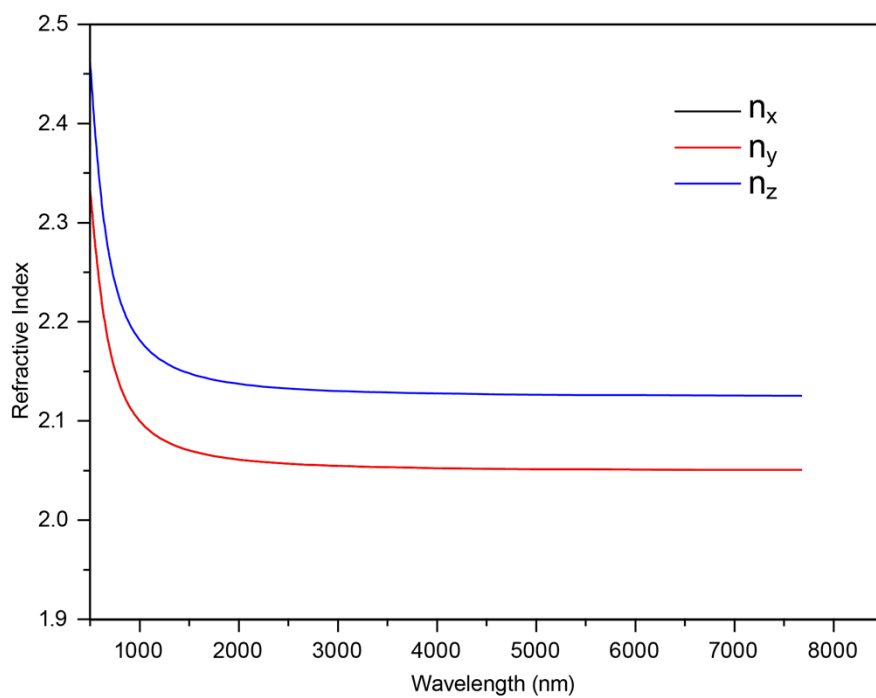

**Figure S16.** Calculated Refractive Indices for  $\text{Cs}_2\text{Hg}_3\text{I}_8 \cdot \text{H}_2\text{O}$ . In the whole wavelength range, the refractive indices  $n_x$  are the same as  $n_y$ .
